# Supplementary material for: Identification of SARS-CoV-2 Variants and Their Clinical Significance in Hefei, China
Source: Front Med (Lausanne). 2022 Jan 10;8:784632. doi: 10.3389/fmed.2021.784632 (PMC8784789; doi:10.3389/fmed.2021.784632)
Supplement: Supplementary file 3 [file Table_2.xlsx]

## Sheet: Sheet1
Supplementary Table 2 The level of inflammatory factors and the grouping information for each patient
Patients	level of inflammatory factors						mutation status
	TNF-α 0.000-8.100(pg/ml)1	IL-6 0.000-5.900(pg/ml)	IL-8 0.000-62.000(pg/ml)	IL-10 0.000-9.100(pg/ml)	IL-2R 223.000-710.000(U/mL)	SF 13.00-150.00(μg/L)	site 8782	site 10380	site 11083	site 13394	site 14418/17614	site 16954	site 18060	site 26144	site 26885	site 28144	site 28253
HF1	8.86	5.76	52	5	686	361	reference2	reference	reference	reference	reference	reference	reference	reference	reference	reference	reference
HF2	12.2	6.01	5	5	357	142.8	reference	variation	reference	reference	reference	reference	reference	variation	reference	reference	reference
HF3	18.6	7.03	7.1	5	898	1411	reference	reference	reference	reference	reference	reference	reference	reference	reference	reference	reference
HF4	11.1	15.5	5	5	542	345.2	reference	reference	reference	reference	reference	reference	reference	reference	reference	reference	reference
HF5	8.82	4.18	5	5	403	521.1	reference	reference	reference	reference	reference	reference	reference	reference	reference	reference	reference
HF6	18.5	31.2	15.5	6.91	1613	1732	reference	reference	variation	reference	reference	reference	reference	reference	reference	reference	reference
HF7	8.03	6.53	6.28	5	303	395.5	reference	reference	variation	reference	variation	reference	reference	reference	reference	reference	reference
HF8	14.3	10.9	5	5	611	215.2	reference	reference	reference	reference	reference	reference	reference	reference	reference	reference	reference
HF9	8.58	2.79	5.4	5	510	872.9	reference	reference	reference	reference	reference	reference	reference	reference	reference	reference	reference
HF10	10.1	5.42	5	5	436	1178	reference	reference	reference	reference	variation	reference	reference	reference	variation	reference	reference
HF11	8.78	2.39	10.8	5.09	711	351.7	reference	variation	reference	reference	reference	reference	reference	reference	reference	reference	reference
HF12	18.5	39.6	12.8	8.77	744	876.9	reference	variation	reference	variation	reference	reference	reference	reference	reference	reference	reference
HF13	5.87	9.36	5	5	223	7.01	reference	variation	variation	variation	variation	reference	reference	reference	variation	reference	variation
HF14	8.37	45.3	5.15	5	772	795.2	reference	reference	variation	reference	variation	reference	reference	reference	variation	reference	reference
HF15	8.16	21.8	15.4	5	589	664.1	reference	variation	variation	reference	variation	reference	reference	reference	variation	variation	reference
HF16	6.46	3.61	5	5	636	282.8	reference	variation	reference	reference	reference	reference	reference	reference	reference	variation	variation
HF17	8.65	6.37	5	5	422	435.9	variation	reference	reference	reference	reference	reference	variation	reference	reference	variation	reference
HF18	4	2	5	5	50	175	variation	variation	reference	reference	reference	reference	variation	variation	reference	variation	variation
HF19	9.65	3.09	5	5	287	178.2	reference	variation	reference	reference	reference	reference	variation	reference	reference	variation	variation
HF20	10.9	14.2	6.21	5.18	540	773.5	variation	variation	reference	variation	reference	reference	variation	reference	reference	variation	reference
HF21	4	2	5	5	50	1629	variation	variation	variation	reference	reference	reference	variation	reference	reference	variation	reference
HF22	8.12	6.9	5	5	367	602.8	variation	variation	variation	variation	reference	reference	variation	reference	reference	variation	reference
HF23	6.16	2	5	5	230	275.7	reference	reference	reference	reference	reference	variation	variation	variation	reference	variation	reference
HF24	14.4	7.5	12.9	14.3	1148	2000	variation	reference	reference	reference	reference	reference	reference	reference	reference	variation	reference
HF25	9.46	6.26	7.31	5	730	245.9	variation	reference	reference	reference	reference	variation	variation	reference	reference	variation	reference
HF26	9.97	4.73	5	5	254	460.2	variation	reference	reference	reference	reference	variation	variation	reference	reference	variation	reference
HF27	6.15	3.71	5	5	414	636.2	variation	variation	reference	reference	reference	reference	reference	reference	reference	variation	reference
HF28	8.2	20.1	5	5	795	71.75	reference	variation	reference	reference	reference	reference	variation	reference	reference	variation	reference
HF29	9.62	2.85	5	5	241	174.4	reference	variation	reference	variation	reference	reference	variation	reference	reference	variation	reference
Note:
1. The numbers under each inflammatory factor represents its reference value range.
2. For each site, we divided patients to two group, "reference" and "variation". "reference" represents the patients carrying COVID-19 which mutated at the site, while "variation" represent the patients carrying COVID-19 which was the same as reference at the site.
